# Supplementary material for: A remotely delivered intervention targeting adults with persisting mild-to-moderate post-concussion symptoms (GAIN Lite): a study protocol for a parallel group randomised trial
Source: PubMed Central journal article supplement — Trials. 2024 Oct 26;25:720. doi: 10.1186/s13063-024-08546-3 (PMC11515229; doi:10.1186/s13063-024-08546-3), 2024-10-26

## Additional file 1 - Biopsychosocial model

### Many conditions affect our function

#### Biological conditions

- Sleep
- Diet
- Exercise/physical fitness
- Illness
- Bodily damage

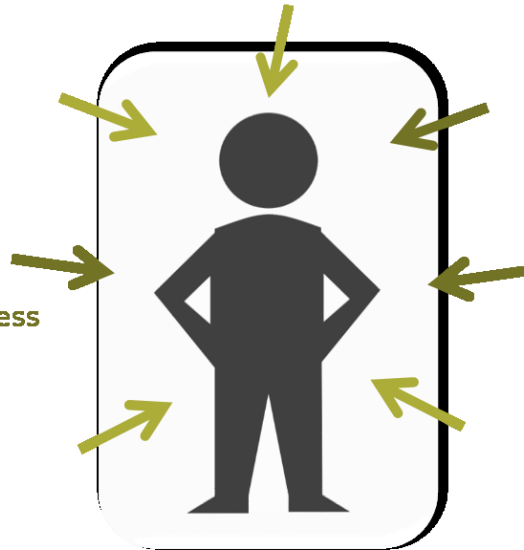

#### Social conditions/Our surroundings

- Understanding from our network
- Physical surroundings
- Demands from the outside  
e.g. family, municipality, school, workplace

#### Psychological conditions

- Stress (Imbalance between resources and demands)
- Thoughts on symptoms and stress
- Behaviour – How we deal with symptoms and stress
- Emotions e.g. anxiety, depression, sadness, guilt or shame
- Personality

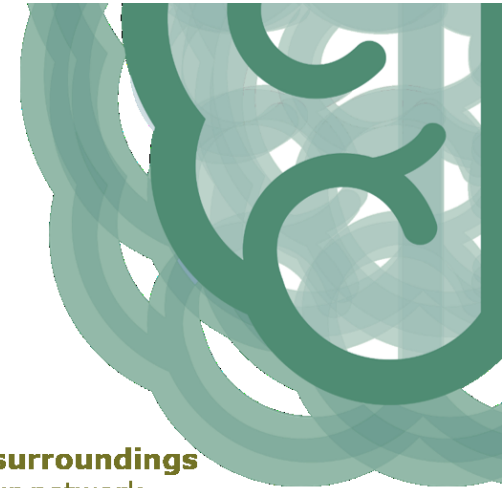

Supplement: 13063_2024_8546_MOESM1_ESM.pdf [file 13063_2024_8546_MOESM1_ESM.pdf]
