# Supplementary material for: A remotely delivered intervention targeting adults with persisting mild-to-moderate post-concussion symptoms (GAIN Lite): a study protocol for a parallel group randomised trial
Source: PubMed Central journal article supplement — Trials. 2024 Oct 26;25:720. doi: 10.1186/s13063-024-08546-3 (PMC11515229; doi:10.1186/s13063-024-08546-3), 2024-10-26
Supplement: 13063_2024_8546_MOESM4_ESM.pdf [file 13063_2024_8546_MOESM4_ESM.pdf]

# Samtykke GAIN Lite

---

Deltagerinformation GAIN Lite

[Attachment: "Skriftlig deltagerinformation GAIN Lite.pdf"]

---

Dato for mundtlig information om projektet "KORT OG GODT OM HJERNERYSTELSE (GAIN Lite)"

---

---

Navn på person, der giver mundtlig information om projektet "KORT OG GODT OM HJERNERYSTELSE (GAIN Lite)"

---

---

Jeg [info\_person\_gain\_lite] erklærer, at forsøgspersonen har modtaget mundtlig og skriftlig information om projektet "KORT OG GODT OM HJERNERYSTELSE (GAIN Lite)"  
Efter min overbevisning er der givet tilstrækkelig information til, at der kan træffes beslutning om deltagelse i projektet.

---

---

Dato for samtykke til deltagelse i projektet "KORT OG GODT OM HJERNERYSTELSE (GAIN Lite)"

---

---

Jeg [id\_arm\_1][fornavne] [id\_1][efternavn] har modtaget information om projektet "KORT OG GODT OM HJERNERYSTELSE (GAIN Lite)" både mundtligt og skriftligt og jeg ved nok om formål, metode, fordele og ulemper til at sige ja til at deltage.  
Jeg ved, at det er frivilligt at deltage, og at jeg altid kan gå ud af projektet, uden at det vil påvirke min nuværende eller fremtidige behandling.  
Jeg giver hermed samtykke til at deltage i forskningsprojektet.

---

---

Må vi når nærværende projekt er afsluttet, evt. kontakte dig med henblik på deltagelse i et andet lodtrækningsforsøg, der handler om at afprøve nye behandlingsmetoder til personer, der oplever symptomer efter hjernerystelse.

- Nej  
 Ja

---

Upload samtykke (i fald ej underskrevet digitalt)
