# Supplementary figures and images for: A remotely delivered intervention targeting adults with persisting mild-to-moderate post-concussion symptoms (GAIN Lite): a study protocol for a parallel group randomised trial
Source: PubMed Central journal article supplement — Trials. 2024 Oct 26;25:720. doi: 10.1186/s13063-024-08546-3 (PMC11515229; doi:10.1186/s13063-024-08546-3), 2024-10-26

## Additional file 2 - The zone-model

### Challenges without overload bring development

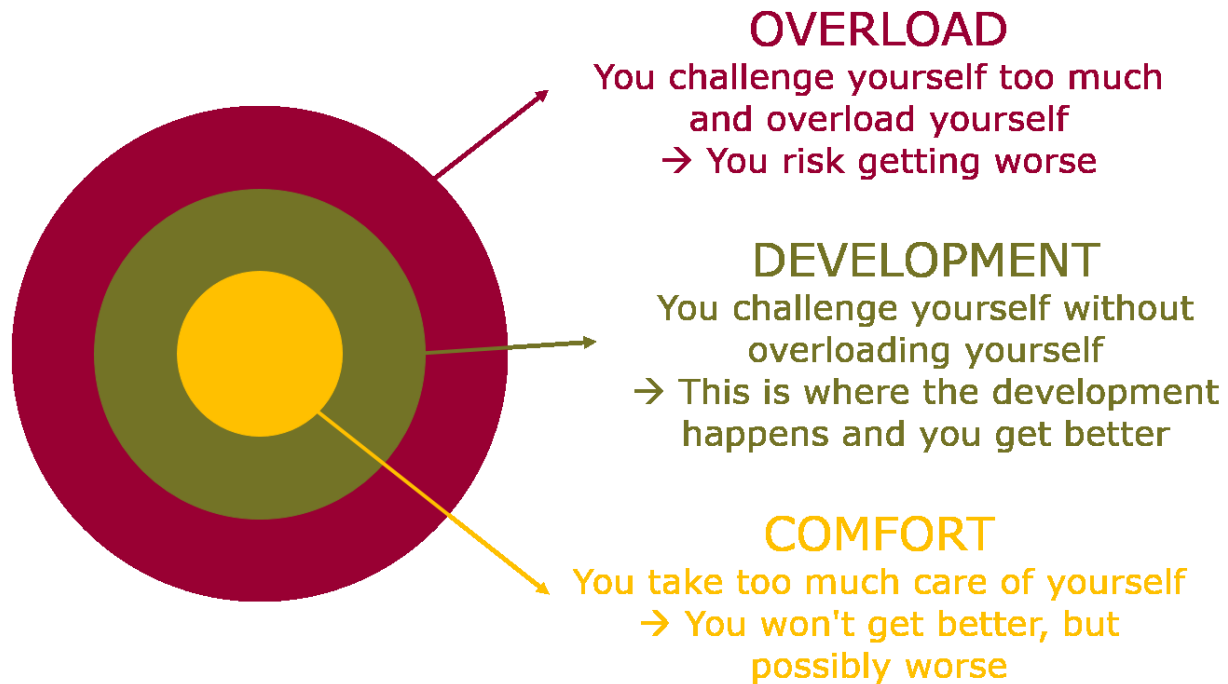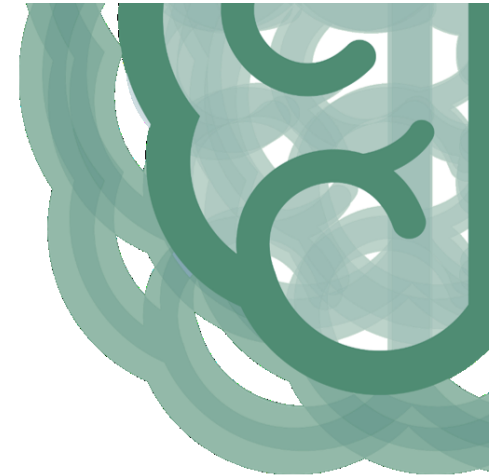

Supplement: 13063_2024_8546_MOESM2_ESM.pdf [file 13063_2024_8546_MOESM2_ESM.pdf]
